# Supplementary material for: Ontological Analysis of Coronavirus Associated Human Genes at the COVID-19 Disease Portal
Source: MDPI journal article supplement (doi:10.3390/genes13122304), 2022-12-07
Supplement: s1 [file s1]

Figure S1

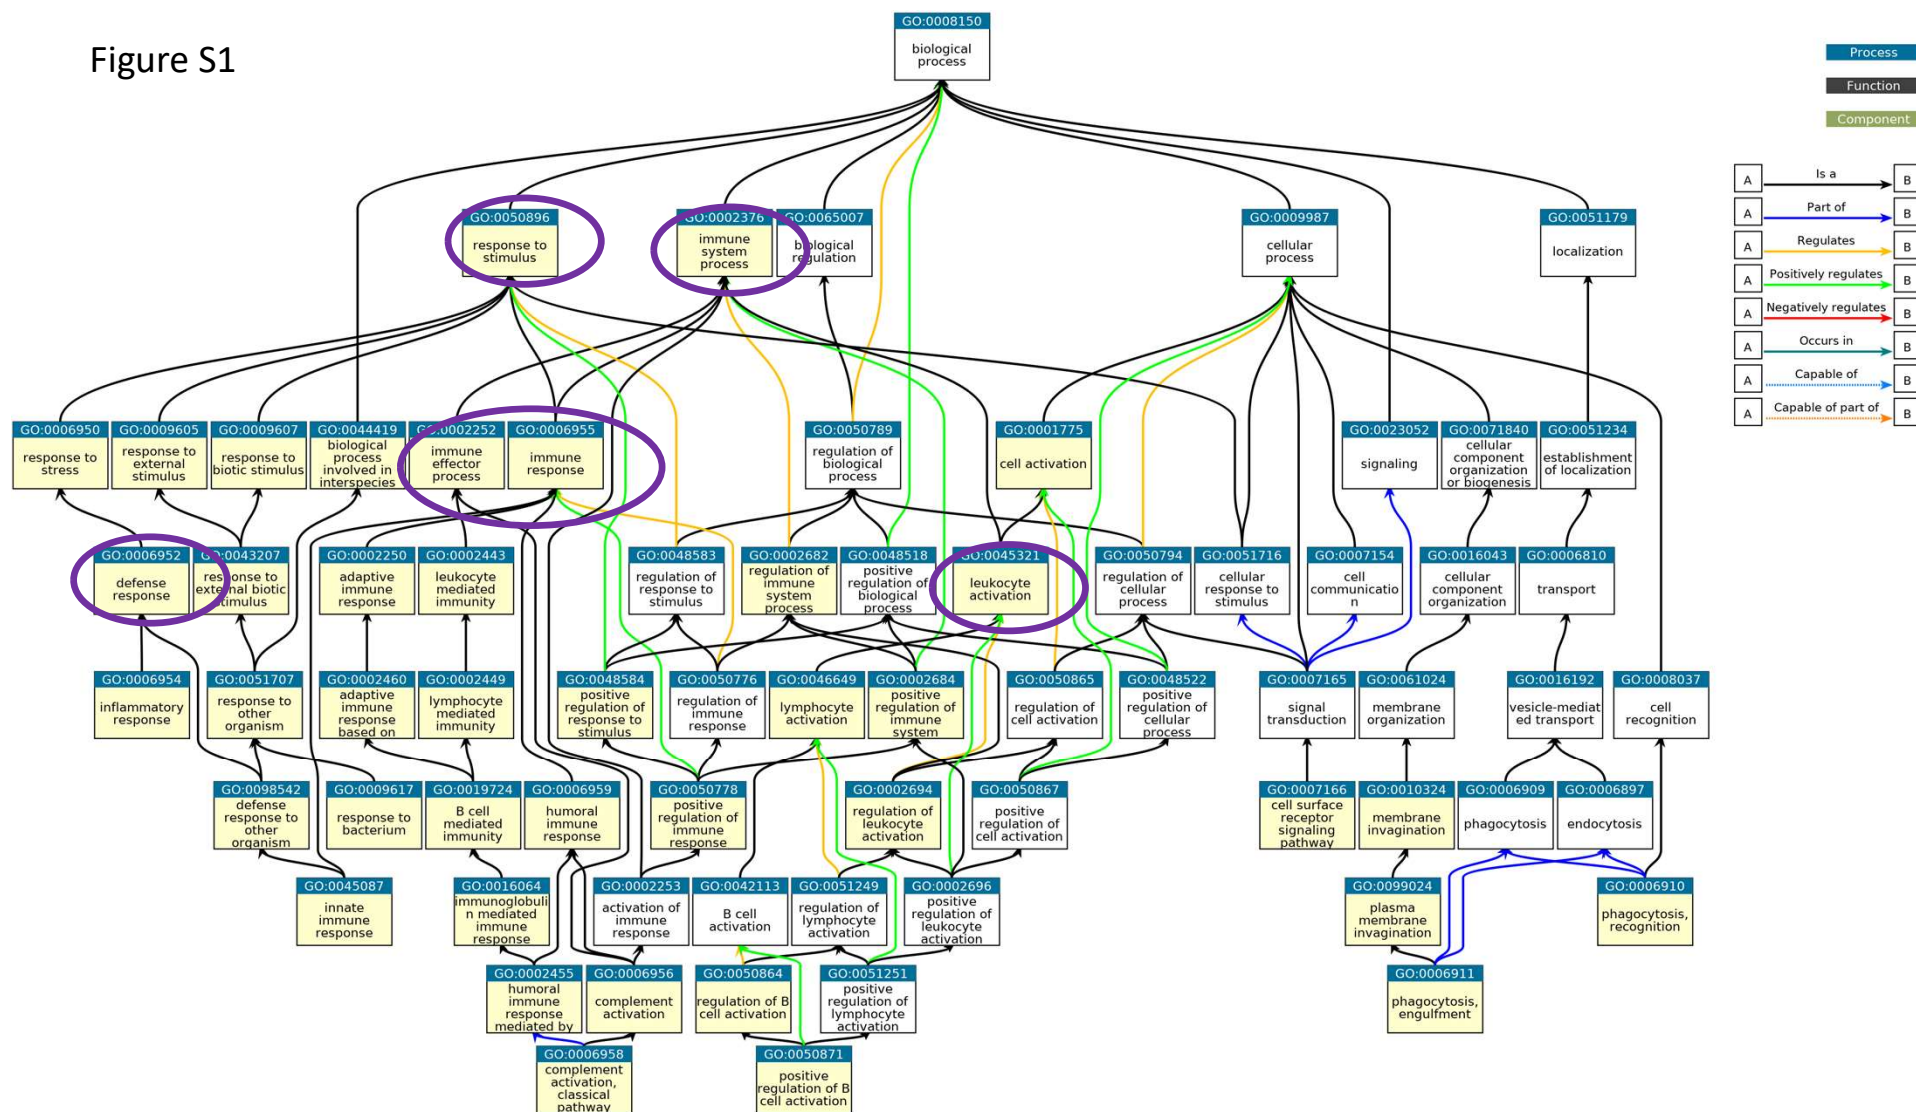

Figure S1. The Gene Ontology (GO) Ancestor chart showing the relations among the enriched biological process (BP) GO terms associated with COVID-19 disease genes. The enriched GO terms are highlighted in yellow, and the circled terms are enriched high level BP terms. 'response to stimulus' and 'immune system process' are the two major branches where most of the enriched terms reside.

Figure S2

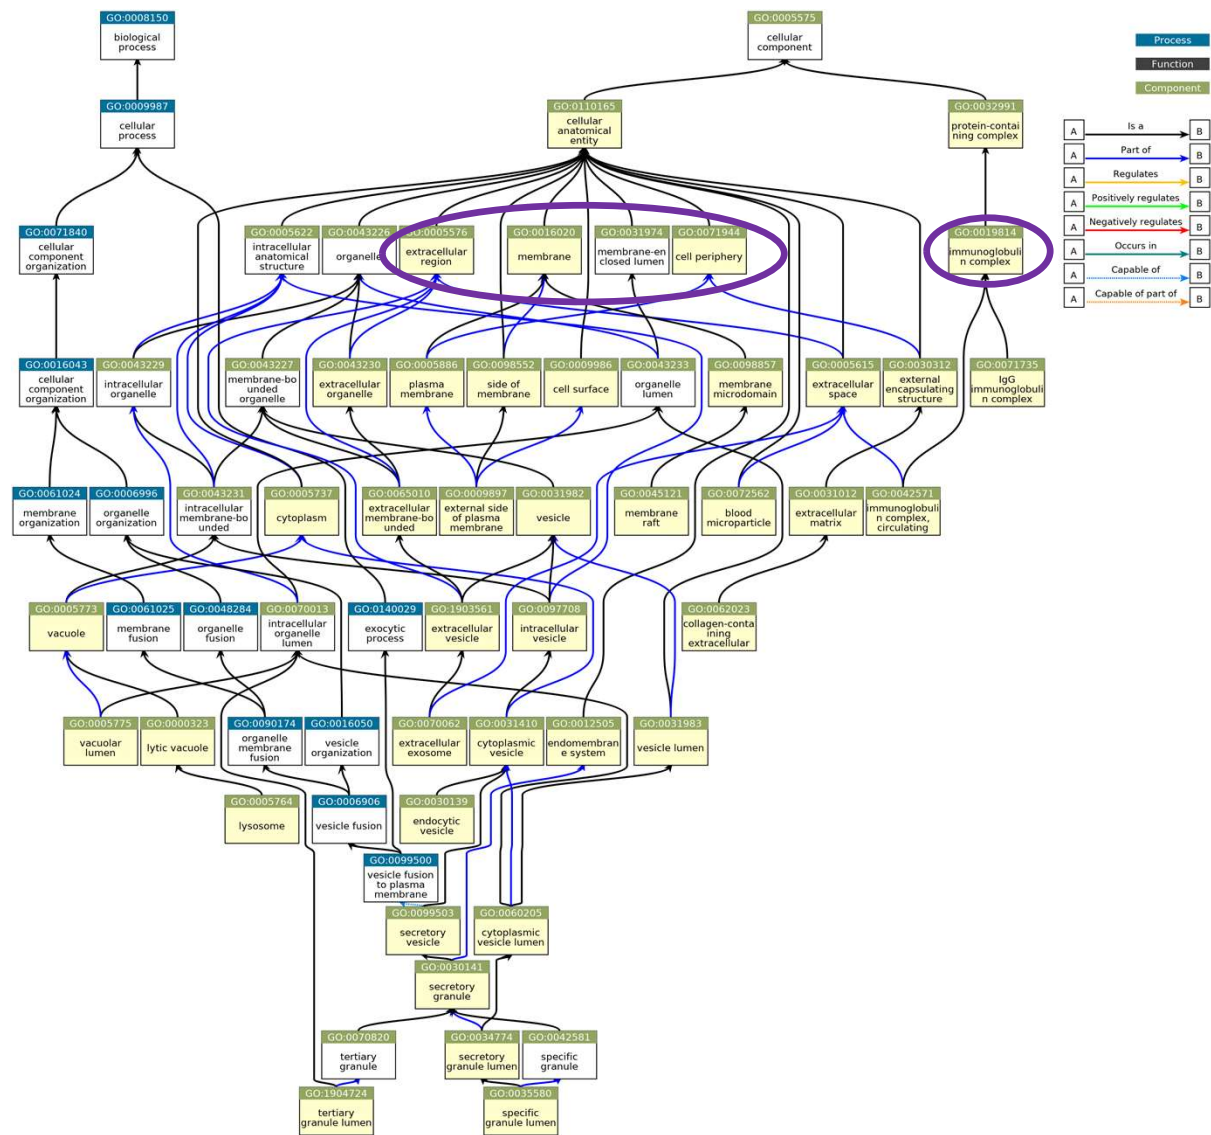

Figure S2. The Gene Ontology (GO) Ancestor chart showing the relations among the enriched cellular component (CC) GO terms associated with COVID-19 disease genes. The enriched GO terms are highlighted in yellow, and the circled terms are enriched high level CC terms.

Figure S3

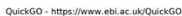

Figure S3. The Gene Ontology (GO) Ancestor chart showing the relations among the enriched molecular function (MF) GO terms associated with COVID-19 disease genes. The enriched GO terms are highlighted in yellow, and the circled terms are enriched high level BP terms. 'molecular function regulator' and 'binding' are the two major branches where most of the enriched terms reside.
